# Supplementary material for: Synaptic Transmission and Plasticity in an Active Cortical Network
Source: PLOS journal article supplement (doi:10.1371/journal.pone.0000670), 2007-07-31

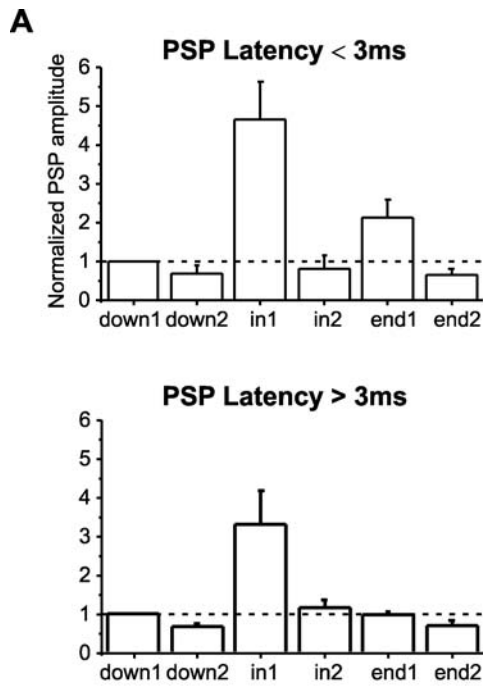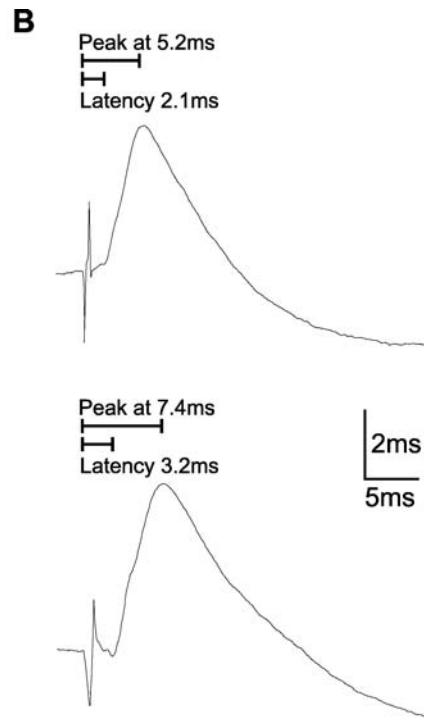

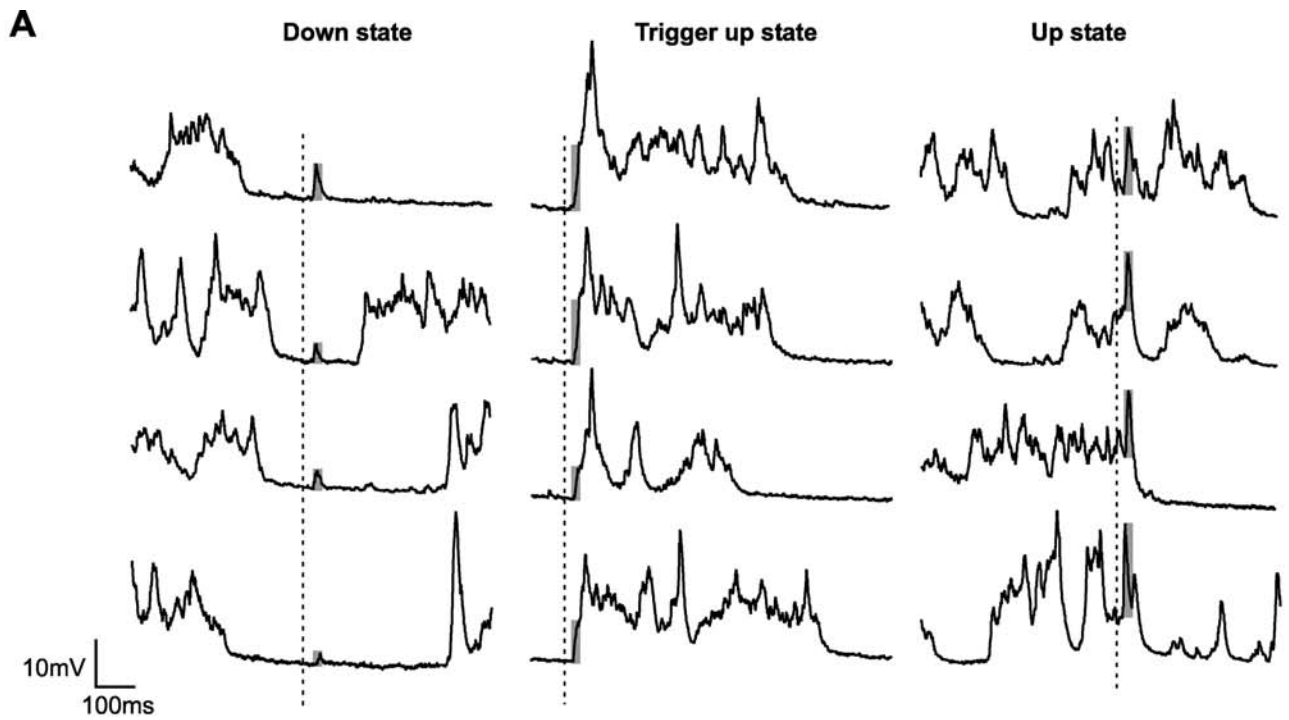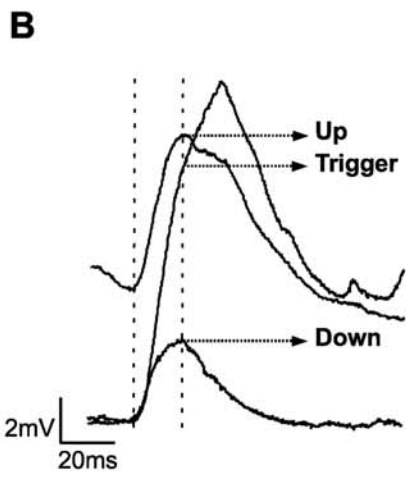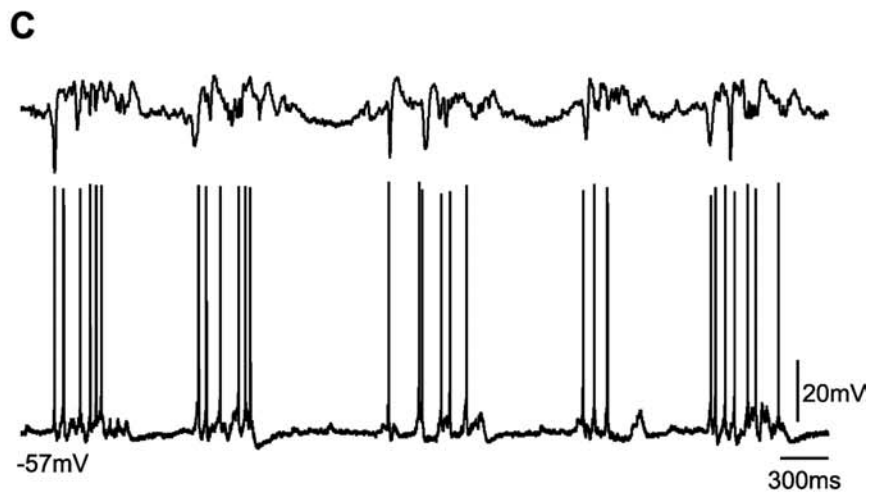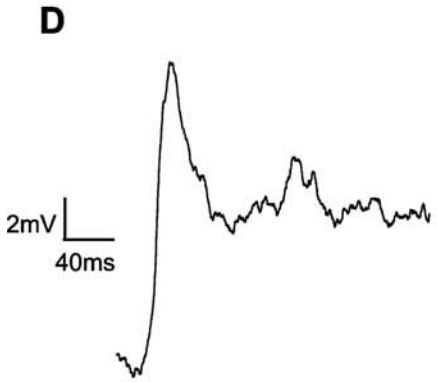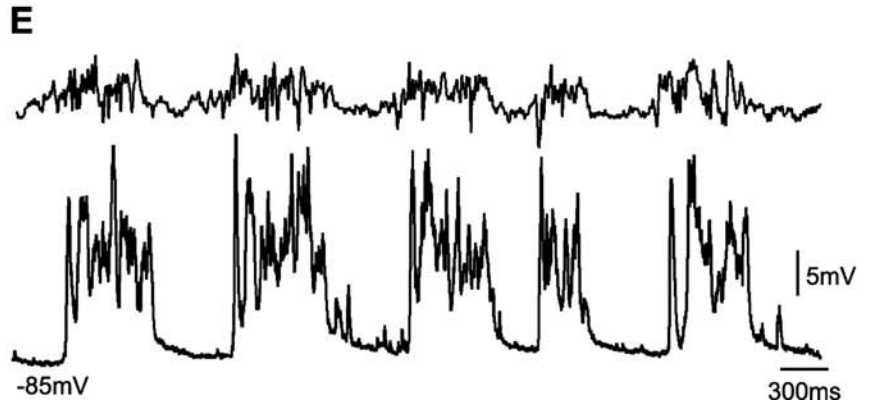

Supplement: S2 (10.1371/journal.pone.0000670.s002) [file journal.pone.0000670.s002.pdf]
